# Supplementary material for: Stepwise Endoscopy Based on Sigmoidoscopy in Evaluating Pediatric Graft-versus-Host Disease
Source: PubMed Central journal article supplement — Pediatr Gastroenterol Hepatol Nutr. 2016 Mar 22;19(1):29–37. doi: 10.5223/pghn.2016.19.1.29 (PMC4821980; doi:10.5223/pghn.2016.19.1.29), 2016-03-22
Supplement: pghn-19-29-s001.pdf [file pghn-19-29-s001.pdf]

**Supplementary Table. Patients flow**

| Day    | Symptoms |     |     |     |     | Method | GVHD of segment |     |     |    |     | Endoscopic findings |     |    |    |    | GVHD |     | CMV |      |       |     |    |
|--------|----------|-----|-----|-----|-----|--------|-----------------|-----|-----|----|-----|---------------------|-----|----|----|----|------|-----|-----|------|-------|-----|----|
|        | VOM      | ABP | DIA | HTM | HCZ |        | ES              | ST  | DD  | CC | CL  | RS                  | ES  | ST | DD | CC | CL   | RS  | GI  | Skin | Liver | ICH | Cx |
| Pt 1   |          |     | (+) |     |     | Lower  | (-)             | (-) | (+) |    | (+) | (+)                 | (+) |    |    |    | 3    | (+) | (+) |      | (-)   | (-) | L  |
| Pt 2-1 |          | (+) | (+) | (+) |     | Both   | (-)             | (-) | (+) |    | (+) | (+)                 | 4   | 2  | 3  |    | 2    | (+) |     |      | (-)   | (-) | D  |
| Pt 2-2 |          |     | (+) |     |     | Both   | (-)             | (-) | (+) |    | (+) | (+)                 | 4   | 2  | 3  | 0  | 1    | 2   | (+) |      | (-)   | (-) |    |
| Pt 3   |          | (+) | (+) |     | (+) | Both   | (+)             | (-) | (+) |    | (+) | (+)                 | 3   | 2  | 3  |    | 3    | (+) |     |      | (-)   | (-) | L  |
| Pt 4   | (+)      | (+) | (+) |     | (+) | Upper  | (+)             | (+) | (+) |    | (+) | (+)                 | 0   | 0  | 1  |    |      | (+) | (+) | (+)  | (-)   | (-) | L  |
| Pt 5-1 |          | (+) | (+) |     | (+) | Both   | (+)             | (+) | (+) |    | (+) | (+)                 | 3   | 2  | 1  | 4  | 1    | 1   | (+) | (+)  | (-)   | (-) | D  |
| Pt 5-2 |          | (+) | (+) |     | (+) | Lower  | (+)             | (+) | (+) |    | (+) | (+)                 |     |    |    |    | 4    | (+) |     |      | (-)   | (-) |    |
| Pt 6-1 |          | (+) | (+) |     | (+) | Lower  | (+)             | (+) | (+) |    | (+) | (+)                 |     |    |    |    | 4    | (+) |     | (+)  | (-)   | (-) | D  |
| Pt 6-2 |          | (+) | (+) |     | (+) | Both   | (-)             | (-) | (+) |    | (-) | (-)                 | 0   | 0  | 4  |    | 4    | (+) |     | (+)  | (-)   | (+) | RS |
| Pt 6-3 |          | (+) | (+) |     | (+) | Lower  | (+)             | (+) | (+) |    | (+) | (+)                 |     |    |    |    | 4    | (+) |     | (+)  | (-)   | (-) |    |
| Pt 7   |          | (+) | (+) |     | (+) | Lower  | (+)             | (+) | (+) |    | (+) | (+)                 |     |    |    |    | 2    | (+) | (+) | (+)  | (-)   | (-) | D  |
| Pt 8   |          | (+) | (+) |     | (+) | Lower  | (+)             | (+) | (+) |    | (+) | (+)                 |     |    |    |    | 0    | (+) | (+) | (+)  | (-)   | (-) | L  |
| Pt 9-1 |          | (+) | (+) |     | (+) | Both   | (-)             | (-) | (-) |    | (+) | (+)                 | 0   | 0  | 0  | 0  | 0    | (+) |     |      | (-)   | (-) | L  |
| Pt 9-2 |          | (+) | (+) |     | (+) | Both   | (-)             | (-) | (-) |    | (+) | (+)                 | 4   | 0  | 3  | 1  |      | (-) |     |      | (-)   | (-) |    |
| Pt 10  |          | (+) | (+) |     | (+) | Both   | (-)             | (-) | (+) |    | (+) | (+)                 | 3   | 2  | 3  | 0  | 0    | (+) | (+) | (+)  | (-)   | (+) | L  |
| Pt 11  |          | (+) | (+) |     | (+) | Both   | (-)             | (+) | (+) |    | (-) | (+)                 | 2   | 0  | 0  | 1  | 1    | (+) |     |      | (-)   | (-) | L  |
| Pt 12  |          | (+) | (+) |     | (+) | Both   | (-)             | (-) | (+) |    | (+) | (+)                 | 3   | 0  | 0  | 4  | 1    | 1   | (+) |      | (+)   | CC  | L  |
| Pt 13  |          | (+) | (+) |     | (+) | Both   | (-)             | (-) | (-) |    | (-) | (-)                 | 3   | 0  | 4  |    | 0    | (-) | (+) | (+)  | (+)   | (-) | L  |
| Pt 14  |          | (+) | (+) |     | (+) | Upper  | (-)             | (-) | (-) |    | (-) | (-)                 | 3   | 0  | 4  |    | 3    | (-) |     | (+)  | (+)   | (-) | D  |
| Pt 15  |          | (+) | (+) |     | (+) | Lower  | (-)             | (-) | (-) |    | (-) | (-)                 |     |    |    |    | 0    | (-) | (-) | (+)  | (-)   | (-) | D  |

Pt: patient, VOM: vomiting, ABP: abdomen pain, DIA: diarrhea, HTM: hematemesis, HCZ: hematochezia, ES: esophagus, ST: stomach, DD: duodenum, CC: cecum, CL: colon, RS: rectosigmoid colon, GI: gastrointestinal, ICH: immunohistochemistry, Cx: complication, Px: rognosis, L: live, D: death.
